# Supplementary material for: Fabrication of high-efficiency PET polymer-based flexible dye-sensitized solar cells and tapes via heat sink-supported thermal sintering of bilayer TiO2 photoanodes
Source: Royal Society of Chemistry journal article supplement (doi:10.1039/d2se00111j), 2022-01-01

## Supporting Information

### **Fabrication of high efficiency PET polymer based flexible dye sensitized solar cells and tapes through heat sink supported thermal sintering of bilayer TiO<sub>2</sub> photoanodes**

B. Murali<sup>a</sup>, K. Gireesh Baiju<sup>a,b</sup>, R. Krishna Prasad<sup>a,b</sup>, K. Jayanarayanan<sup>a,b</sup>, Duraisamy Kumaresan<sup>a,b,\*</sup>

*a. Centre of Excellence in Advanced Materials and Green Technologies, Amrita School of Engineering, Coimbatore 641112, Amrita Vishwa Vidyapeetham, India*

*b. Department of Chemical Engineering and Materials Science, Amrita School of Engineering, Coimbatore, Amrita Vishwa Vidyapeetham, India*

\* E-mail: rdkumares@gmail.com, k\_duraisamy@cb.amrita.edu, Tel: +91-422-2685000.

### S1: Compression press hot plate + heat sink + chiller characteristics

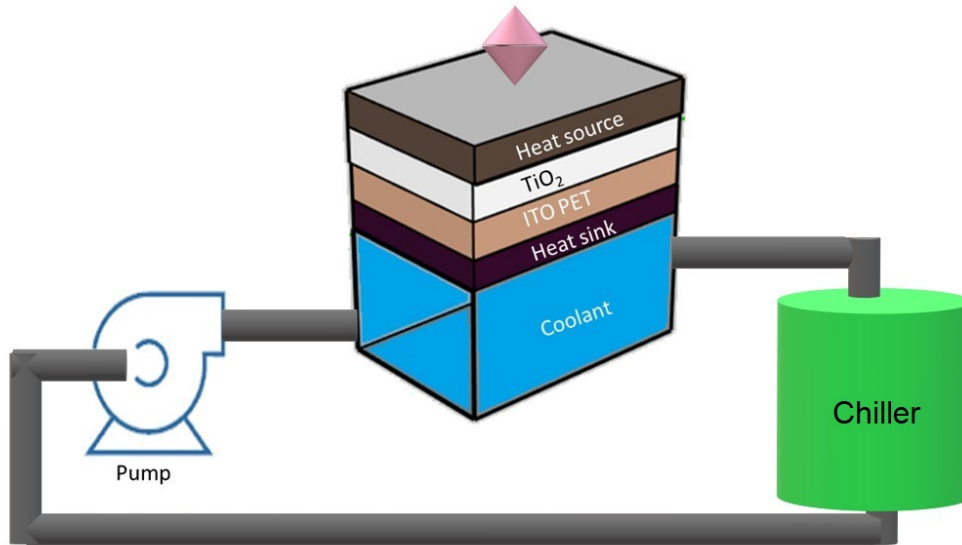

A 1:1 v/v mixture of water and ethylene glycol is used as coolant for the circulation between chiller and heat sink, which produces the lowest surface temperature of heat sink about  $-14\text{ }^{\circ}\text{C}$ . From the plate fin heat sink channel width and length, coolant density and velocity Reynolds number ( $Re$ ) calculated is 236 and modified channel Reynolds number ( $Re_b$ ) is 4.

### S2: SEM images of ITO PET (left image) and $\text{TiO}_2$ nanoparticles coated ITO PET (right image) sintered at $250\text{ }^{\circ}\text{C}$

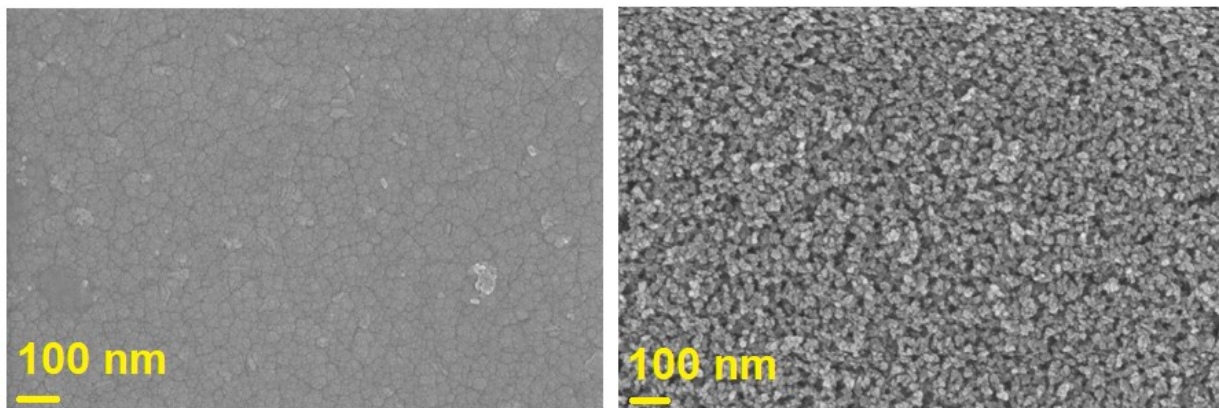

**S3. Image of 0.5 x 0.5 cm<sup>2</sup> TiO<sub>2</sub> mono layer coated ITO PET sintered at 250 °C and bent up to 1 cm radius during bending test**

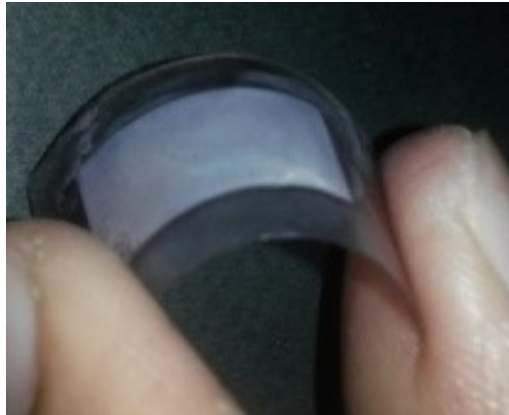

**S4. XRD patterns of TNP monolayer and TNP+TNW bilayer coated ITO glass substrates sintered at 250 °C**

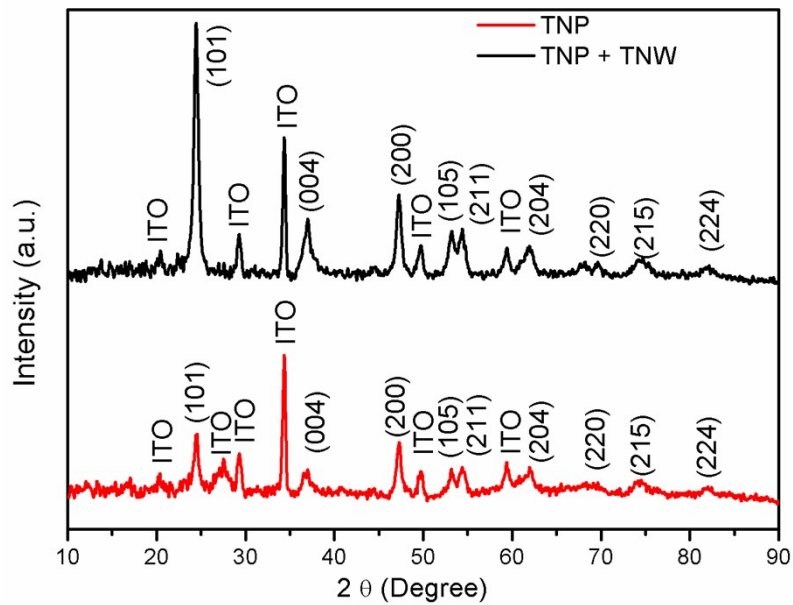

**S5. UV-visible absorption spectra of dye desorbed from TNP, TNP+TNW, and TNP+TNP based FDSSC photoanodes**

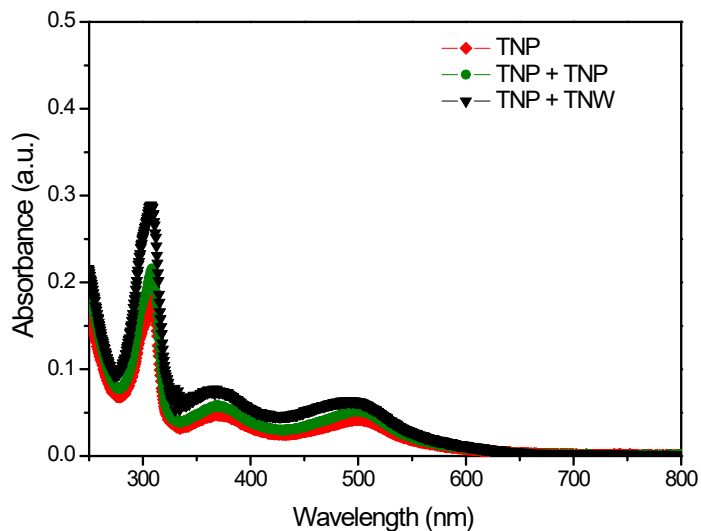

**S6. Integrated  $J_{sc}$  calculated based on the IPCE curves of mono and bilayer  $TiO_2$  photoanodes based FDSSCs.**

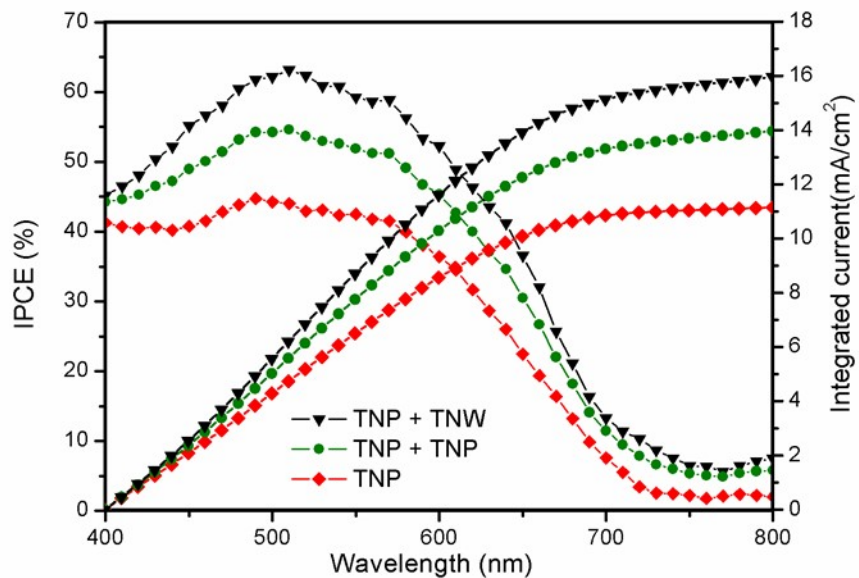

## S7. Electrochemical impedance parameters calculation of photoanodes using the equivalent circuit and their comparison

EIS parameters of FDSSCs of mono and bilayer photoanodes obtained from the Nyquist plots recorded at -0.75 V applied bias potential and fitted with an equivalent circuit.

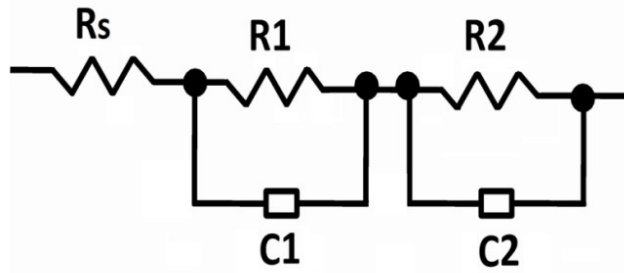

### Chemical capacitance

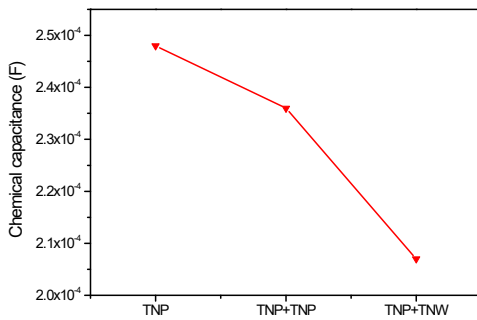

### Electron lifetime

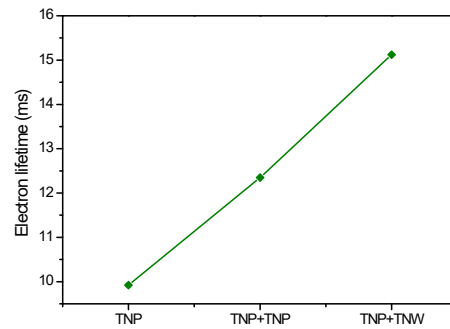

### Charge transfer resistance

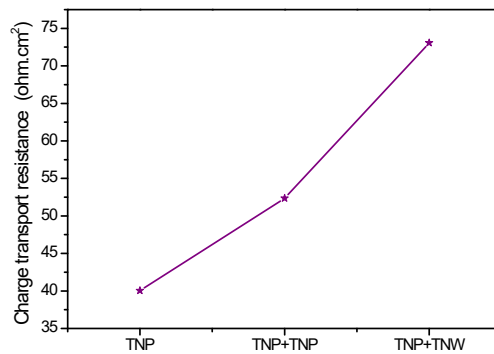

Supplement: d2se00111j1.pdf [file d2se00111j1.pdf]
